# Supplementary material for: Demonstration of doxorubicin's cardiotoxicity and screening using a 3D bioprinted spheroidal droplet-based system
Source: Royal Society of Chemistry journal article supplement (doi:10.1039/d3ra00421j), 2023-01-01
Supplement: d3ra00421j1.pdf [file d3ra00421j1.pdf]

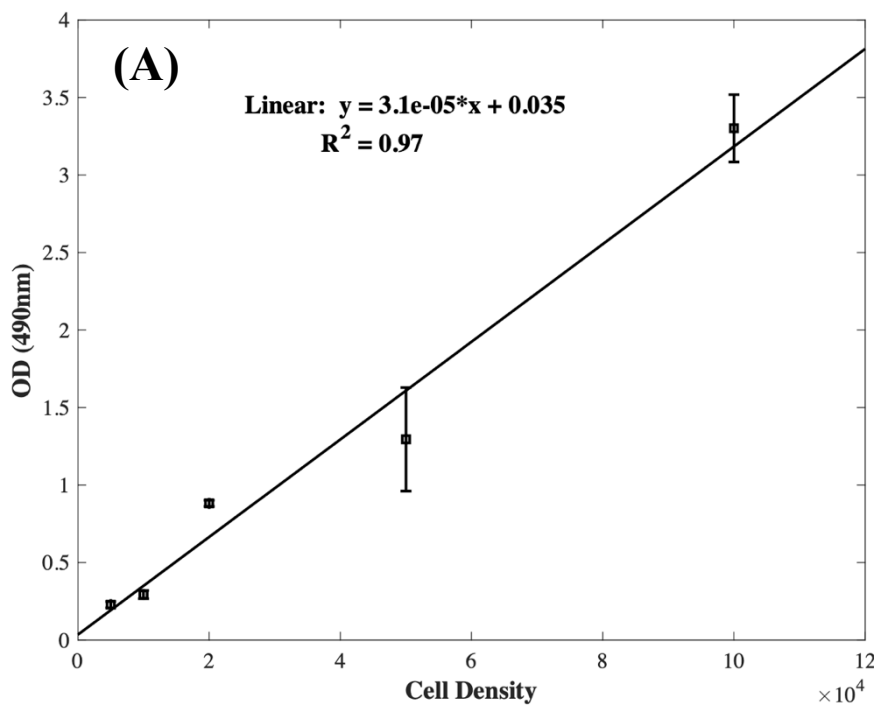

| <b>(B)</b>                      | <b>Day 1</b>                | <b>Day 3</b>                | <b>Day 5</b>                |
|---------------------------------|-----------------------------|-----------------------------|-----------------------------|
|                                 | <b>Number of LIVE cells</b> | <b>Number of LIVE cells</b> | <b>Number of LIVE cells</b> |
| <b>0.4<math>\mu</math>M DOX</b> | 27903 $\pm$ 620 cells       | 24677 $\pm$ 1234 cells      | 15645 $\pm$ 1203 cells      |
| <b>0.6<math>\mu</math>M DOX</b> | 26290 $\pm$ 1546 cells      | 20483 $\pm$ 1223 cells      | 12741 $\pm$ 889 cells       |
| <b>0.8<math>\mu</math>M DOX</b> | 23709 $\pm$ 1847 cells      | 9516 $\pm$ 1730 cells       | 2742 $\pm$ 457 cells        |
| <b>1<math>\mu</math>M DOX</b>   | 21774 $\pm$ 920 cells       | 5322 $\pm$ 798 cells        | 62 $\pm$ 31 cells           |
| <b>Control (NO DOX)</b>         | 28870 $\pm$ 931 cells       | 28548 $\pm$ 1241 cells      | 27903 $\pm$ 1240 cells      |

**Figure S1.** (A) Graph showing the linear best fit curve of the MTS assay data on CMs with various cell population densities in the 3D bioprinted spheroidal droplets. All values are expressed as Mean  $\pm$  SEM of three replicates (n=3). (B) Table showing the amount of live CMs post-treatment with increasing concentrations of doxorubicin extrapolated from the linear best fit curve of MTS data during 5 days of culture.

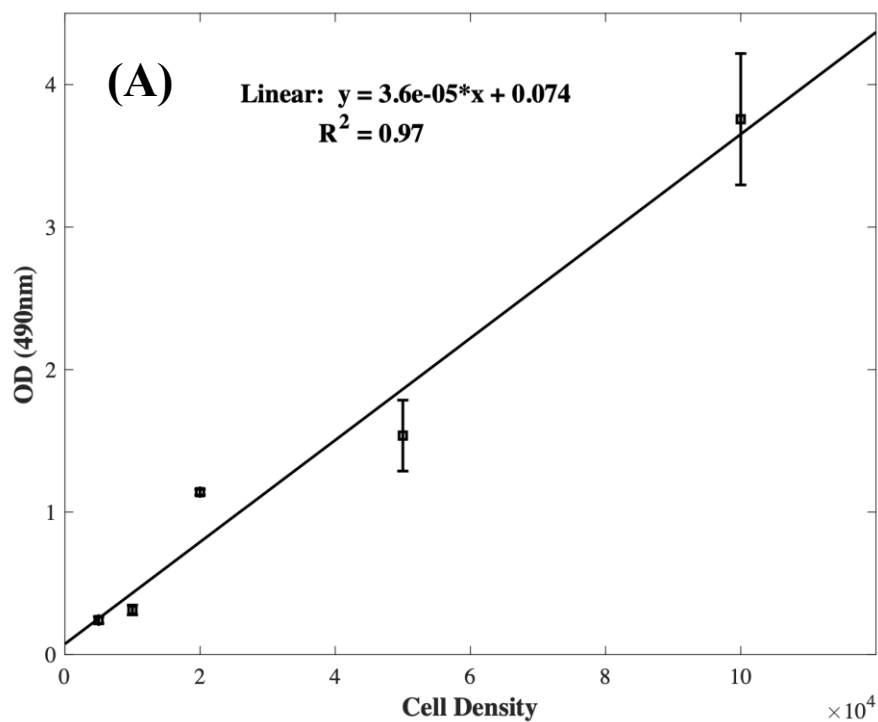

| <b>(B)</b>                      | Day 1                  | Day 3                  | Day 5                  |
|---------------------------------|------------------------|------------------------|------------------------|
|                                 | Number of LIVE cells   | Number of LIVE cells   | Number of LIVE cells   |
| <b>0.4<math>\mu</math>M DOX</b> | 26277 $\pm$ 1030 cells | 21000 $\pm$ 1012 cells | 17944 $\pm$ 997 cells  |
| <b>0.6<math>\mu</math>M DOX</b> | 25722 $\pm$ 1286 cells | 16556 $\pm$ 988 cells  | 13500 $\pm$ 964 cells  |
| <b>0.8<math>\mu</math>M DOX</b> | 22944 $\pm$ 1529 cells | 6278 $\pm$ 1256 cells  | 4056 $\pm$ 369 cells   |
| <b>1<math>\mu</math>M DOX</b>   | 20444 $\pm$ 1262 cells | 1833 $\pm$ 523 cells   | 284 $\pm$ 77 cells     |
| <b>Control (NO DOX)</b>         | 27944 $\pm$ 1294 cells | 27944 $\pm$ 776 cells  | 27944 $\pm$ 1294 cells |

**Figure S2.** (A) Graph showing the linear best fit curve of the MTS assay data on CMs with various cell population densities in 2D samples. All values are expressed as Mean  $\pm$  SEM of three replicates (n=3). (B) Table showing the amount of live CMs post-treatment with increasing concentrations of doxorubicin extrapolated from the linear best fit curve of MTS data during 5 days of culture.

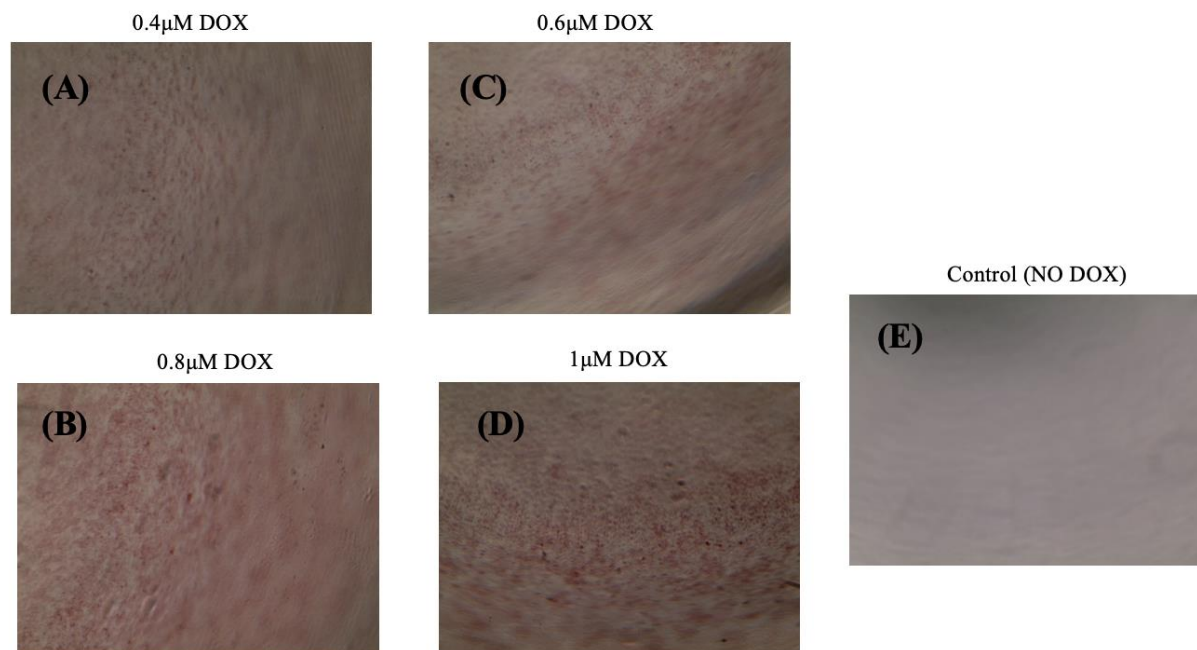

**Figure S3:** (A-D) Representative figures demonstrating the diffusion of DOX (0.4  $\mu\text{M}$ , 0.6  $\mu\text{M}$ , 0.8  $\mu\text{M}$  and 1  $\mu\text{M}$ ) into the hydrogel scaffolds in comparison to the control sample scaffold (E) where DOX was not administered.

## Tiron

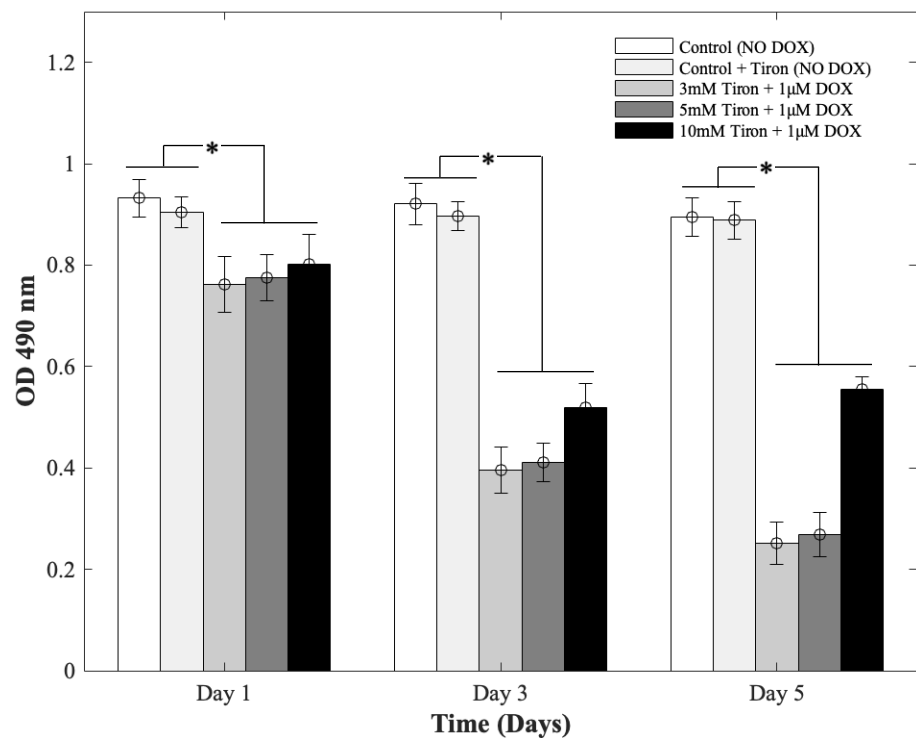

## NAC

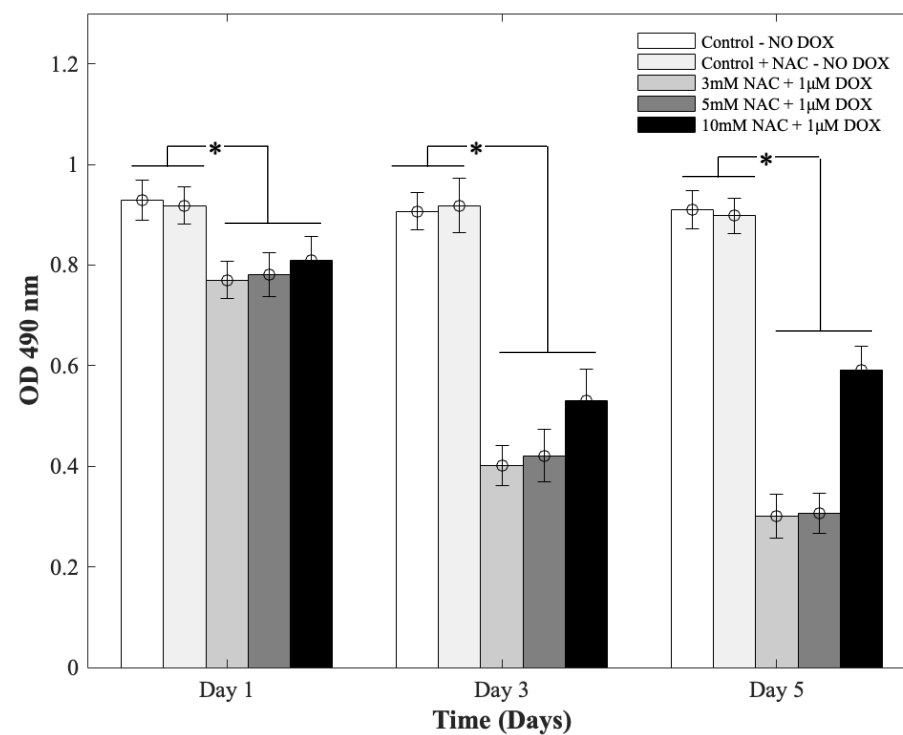

**Figure S4.** Optical density measurements for MTS assay of CMs in the 3D spheroidal droplets treated with increasing concentrations (3mM, 5mM, and 10mM) of (A) Tiron and (B) NAC respectively with 1µM DOX during 5 days of culture. \*p values were found to be all statistically different.

**(A)**

| Tiron                           | Day 1       |                         |                      | Day 3       |                         |                      | Day 5       |                         |                      |
|---------------------------------|-------------|-------------------------|----------------------|-------------|-------------------------|----------------------|-------------|-------------------------|----------------------|
|                                 | OD Value    | % Cell Viability (% CV) | Number of LIVE cells | OD Value    | % Cell Viability (% CV) | Number of LIVE cells | OD Value    | % Cell Viability (% CV) | Number of LIVE cells |
| <b>3mM</b>                      | 0.76 ± 0.06 | 81 ± 6%                 | 23387 ± 1846 cells   | 0.40 ± 0.05 | 41 ± 5%                 | 11774 ± 1472 cells   | 0.25 ± 0.04 | 25 ± 4%                 | 6935 ± 1110 cells    |
| <b>5mM</b>                      | 0.78 ± 0.05 | 83 ± 5%                 | 24032 ± 1541 cells   | 0.41 ± 0.04 | 42 ± 4%                 | 12096 ± 1180 cells   | 0.27 ± 0.04 | 27 ± 4%                 | 7581 ± 1123 cells    |
| <b>10mM</b>                     | 0.80 ± 0.06 | 85 ± 6%                 | 24677 ± 1851 cells   | 0.52 ± 0.05 | 55 ± 5%                 | 15645 ± 1504 cells   | 0.56 ± 0.03 | 61 ± 3%                 | 16935 ± 907 cells    |
| <b>Control (NO DOX)</b>         | 0.93 ± 0.04 | 100%                    | 28871 ± 1242 cells   | 0.92 ± 0.04 | 100%                    | 28548 ± 1241 cells   | 0.90 ± 0.04 | 100%                    | 27903 ± 1240 cells   |
| <b>Control + Tiron (NO DOX)</b> | 0.90 ± 0.03 | 100%                    | 27903 ± 930 cells    | 0.90 ± 0.03 | 100%                    | 27903 ± 930 cells    | 0.89 ± 0.04 | 100%                    | 27581 ± 1239 cells   |

**(B)**

| NAC                             | Day 1       |                         |                      | Day 3       |                         |                      | Day 5       |                         |                      |
|---------------------------------|-------------|-------------------------|----------------------|-------------|-------------------------|----------------------|-------------|-------------------------|----------------------|
|                                 | OD Value    | % Cell Viability (% CV) | Number of LIVE cells | OD Value    | % Cell Viability (% CV) | Number of LIVE cells | OD Value    | % Cell Viability (% CV) | Number of LIVE cells |
| <b>3mM</b>                      | 0.77 ± 0.04 | 82 ± 4%                 | 23710 ± 1232 cells   | 0.40 ± 0.04 | 42 ± 4%                 | 11774 ± 1177 cells   | 0.30 ± 0.04 | 30 ± 4%                 | 8548 ± 1140 cells    |
| <b>5mM</b>                      | 0.78 ± 0.04 | 84 ± 4%                 | 24302 ± 1232 cells   | 0.42 ± 0.05 | 44 ± 5%                 | 12419 ± 1478 cells   | 0.31 ± 0.04 | 31 ± 4%                 | 8871 ± 1145 cells    |
| <b>10mM</b>                     | 0.81 ± 0.05 | 87 ± 5%                 | 25000 ± 1543 cells   | 0.53 ± 0.06 | 57 ± 6%                 | 15968 ± 1808 cells   | 0.59 ± 0.05 | 63 ± 5%                 | 17903 ± 1517 cells   |
| <b>Control (NO DOX)</b>         | 0.93 ± 0.04 | 100%                    | 28870 ± 1242 cells   | 0.91 ± 0.04 | 100%                    | 28226 ± 1241 cells   | 0.91 ± 0.04 | 100%                    | 28226 ± 1241 cells   |
| <b>Control + Tiron (NO DOX)</b> | 0.92 ± 0.04 | 100%                    | 28548 ± 1241 cells   | 0.92 ± 0.05 | 100%                    | 28548 ± 1552 cells   | 0.90 ± 0.04 | 100%                    | 27903 ± 1240 cells   |

**Figure S5.** Tables showing the percent cell viability of CMs in the 3D spheroidal droplets treated with the same concentrations of (A) Tiron and (B) NAC with 1  $\mu$ M DOX extrapolated from the linear best fit curve of MTS data.

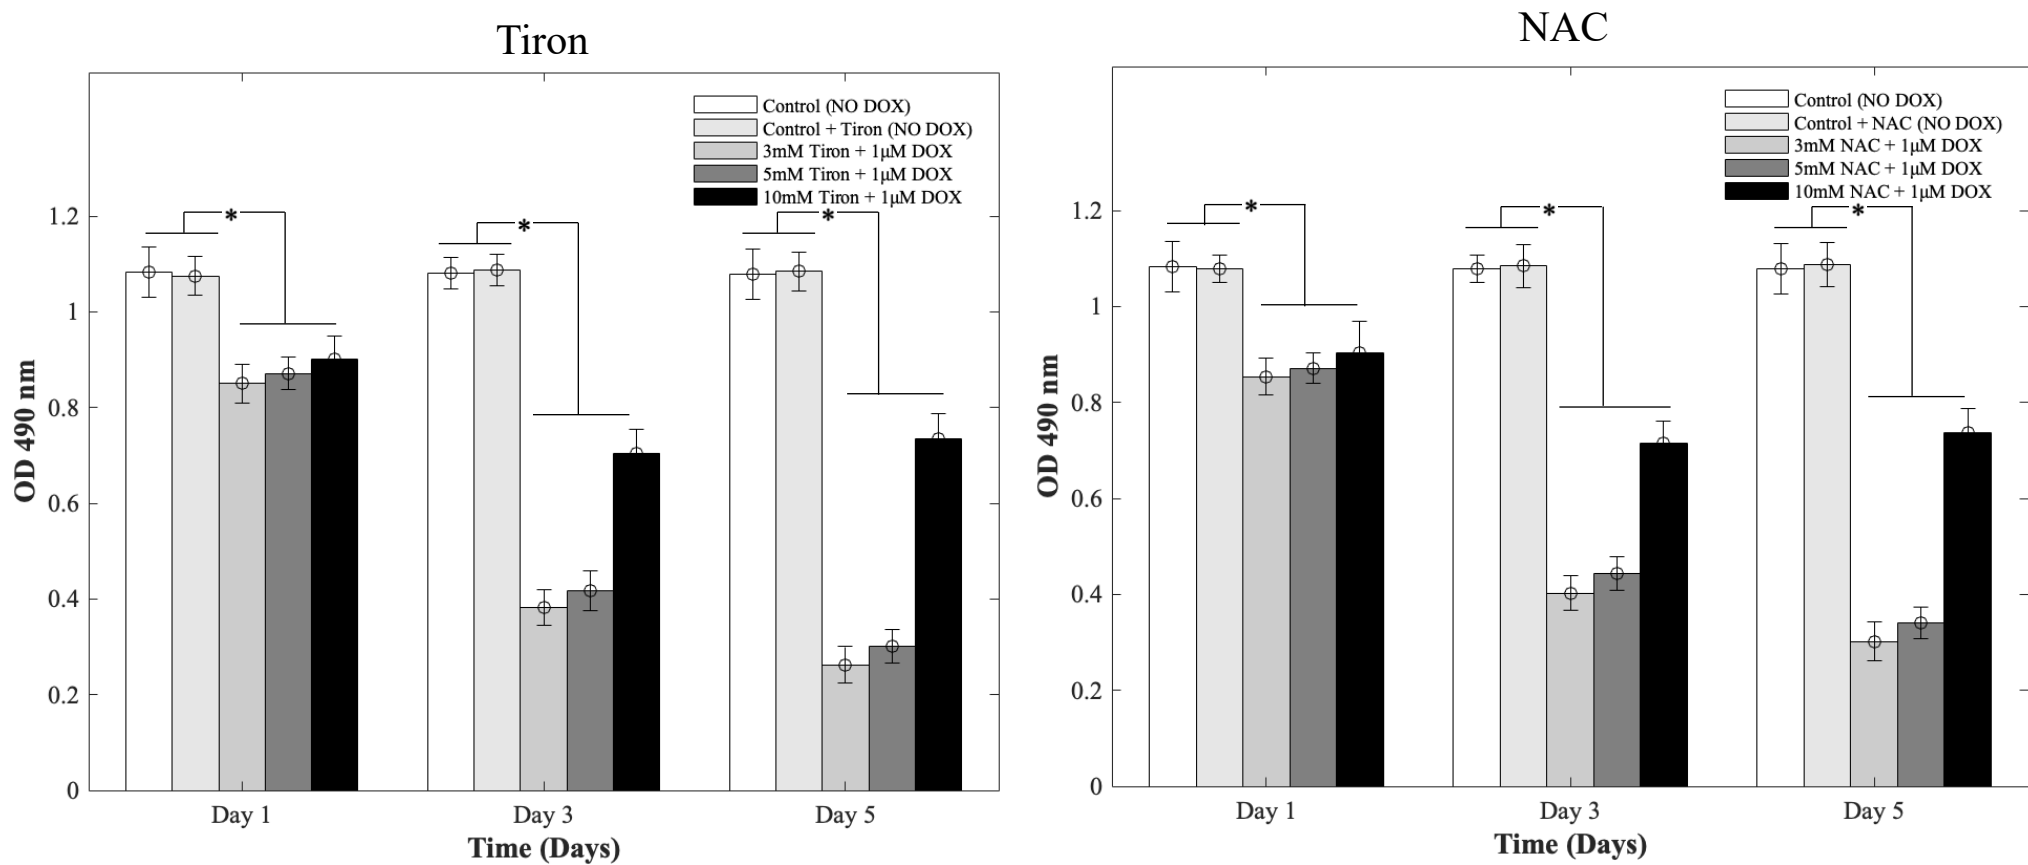

**Figure S6.** Optical density measurements for MTS assay of CMs grown on 2D samples with increasing concentrations (3mM,5mM, and 10mM) of (A) Tiron and (B) NAC with 1 $\mu$ M DOX after 5 days of culture. \*p values were found to be all statistically different.

| Tiron                    | (A) Day 1   |                         |                      | Day 3       |                         |                      | Day 5       |                         |                      |
|--------------------------|-------------|-------------------------|----------------------|-------------|-------------------------|----------------------|-------------|-------------------------|----------------------|
|                          | OD Value    | % Cell Viability (% CV) | Number of LIVE cells | OD Value    | % Cell Viability (% CV) | Number of LIVE cells | OD Value    | % Cell Viability (% CV) | Number of LIVE cells |
| 3mM                      | 0.85 ± 0.04 | 77 ± 4%                 | 21556 ± 1014 cells   | 0.38 ± 0.04 | 30 ± 3%                 | 8500 ± 895 cells     | 0.26 ± 0.04 | 18 ± 3%                 | 5167 ± 795 cells     |
| 5mM                      | 0.87 ± 0.03 | 79 ± 3%                 | 22111 ± 762 cells    | 0.42 ± 0.04 | 34 ± 3%                 | 9611 ± 915 cells     | 0.30 ± 0.04 | 22 ± 3%                 | 6278 ± 837 cells     |
| 10mM                     | 0.90 ± 0.05 | 82 ± 5%                 | 22944 ± 1275 cells   | 0.71 ± 0.05 | 63 ± 4%                 | 17667 ± 1244 cells   | 0.73 ± 0.05 | 65 ± 4%                 | 18222 ± 1248 cells   |
| Control (NO DOX)         | 1.08 ± 0.05 | 100%                    | 27944 ± 1294 cells   | 1.08 ± 0.03 | 100%                    | 27944 ± 776 cells    | 1.08 ± 0.05 | 100%                    | 27944 ± 1294 cells   |
| Control + Tiron (NO DOX) | 1.08 ± 0.04 | 100%                    | 27944 ± 1035 cells   | 1.09 ± 0.03 | 100%                    | 28222 ± 777 cells    | 1.08 ± 0.04 | 100%                    | 27944 ± 1035 cells   |

| NAC                    | (B) Day 1   |                         |                      | Day 3       |                         |                      | Day 5       |                         |                      |
|------------------------|-------------|-------------------------|----------------------|-------------|-------------------------|----------------------|-------------|-------------------------|----------------------|
|                        | OD Value    | % Cell Viability (% CV) | Number of LIVE cells | OD Value    | % Cell Viability (% CV) | Number of LIVE cells | OD Value    | % Cell Viability (% CV) | Number of LIVE cells |
| 3mM                    | 0.85 ± 0.04 | 77 ± 4%                 | 21556 ± 1014 cells   | 0.40 ± 0.04 | 32 ± 3%                 | 9056 ± 906 cells     | 0.30 ± 0.04 | 22 ± 3%                 | 6278 ± 837 cells     |
| 5mM                    | 0.87 ± 0.03 | 79 ± 3%                 | 22111 ± 762 cells    | 0.44 ± 0.04 | 36 ± 3%                 | 10166 ± 924 cells    | 0.34 ± 0.03 | 26 ± 2%                 | 7389 ± 652 cells     |
| 10mM                   | 0.90 ± 0.07 | 82 ± 6%                 | 22944 ± 1785 cells   | 0.72 ± 0.05 | 64 ± 4%                 | 17944 ± 1246 cells   | 0.74 ± 0.05 | 66 ± 4%                 | 18500 ± 1250 cells   |
| Control (NO DOX)       | 1.08 ± 0.05 | 100%                    | 27944 ± 1294 cells   | 1.08 ± 0.03 | 100%                    | 27944 ± 776 cells    | 1.08 ± 0.05 | 100%                    | 27944 ± 1294 cells   |
| Control + NAC (NO DOX) | 1.08 ± 0.03 | 100%                    | 27944 ± 776 cells    | 1.08 ± 0.05 | 100%                    | 27944 ± 1294 cells   | 1.09 ± 0.05 | 100%                    | 28222 ± 1295 cells   |

**Figure S7.** (A, B) Tables showing the percent % CV and number of live CMs grown on 2D samples extrapolated from the linear best fit curve of MTS data after 5 days of culture.

| <b>(A)</b>   |                                 | <b>Day 1</b>                | <b>Day 3</b>                | <b>Day 5</b>                |
|--------------|---------------------------------|-----------------------------|-----------------------------|-----------------------------|
|              |                                 | <b>Number of LIVE cells</b> | <b>Number of LIVE cells</b> | <b>Number of LIVE cells</b> |
| <b>Tiron</b> | <b>1mM</b>                      | 23709 ± 1847 cells          | 11452 ± 881 cells           | 6613 ± 827 cells            |
|              | <b>8mM</b>                      | 24032 ± 1849 cells          | 15000 ± 1200 cells          | 14032 ± 597 cells           |
|              | <b>15mM</b>                     | 28225 ± 1551 cells          | 28226 ± 1241 cells          | 25645 ± 1545 cells          |
|              | <b>Control (NO DOX)</b>         | 28871 ± 1242 cells          | 28548 ± 1241 cells          | 27903 ± 1240 cells          |
|              | <b>Control + Tiron (NO DOX)</b> | 28548 ± 1552 cells          | 28226 ± 931 cells           | 28225 ± 1241 cells          |

| <b>(B)</b> |                                 | <b>Day 1</b>                | <b>Day 3</b>                | <b>Day 5</b>                |
|------------|---------------------------------|-----------------------------|-----------------------------|-----------------------------|
|            |                                 | <b>Number of LIVE cells</b> | <b>Number of LIVE cells</b> | <b>Number of LIVE cells</b> |
| <b>NAC</b> | <b>1mM</b>                      | 22741 ± 922 cells           | 12419 ± 1183 cells          | 6935 ± 1110 cells           |
|            | <b>8mM</b>                      | 23710 ± 1232 cells          | 15645 ± 1203 cells          | 15000 ± 900 cells           |
|            | <b>15mM</b>                     | 27903 ± 620 cells           | 26612 ± 1547 cells          | 26612 ± 619 cells           |
|            | <b>Control (NO DOX)</b>         | 28870 ± 1242 cells          | 28548 ± 1241 cells          | 27903 ± 1240 cells          |
|            | <b>Control + Tiron (NO DOX)</b> | 28548 ± 931 cells           | 28548 ± 1552 cells          | 27903 ± 1240 cells          |

**Figure S8.** Tables showing the amount of live CMs in the 3D spheroidal droplets post-treatment with increasing concentrations of (A) Tiron and (B) NAC extrapolated from the linear best fit curve of MTS data during 5 days of culture.



| <b>(A)</b>   |                                 | <b>Day 1</b>                | <b>Day 3</b>                | <b>Day 5</b>                |
|--------------|---------------------------------|-----------------------------|-----------------------------|-----------------------------|
|              |                                 | <b>Number of LIVE cells</b> | <b>Number of LIVE cells</b> | <b>Number of LIVE cells</b> |
| <b>Tiron</b> | <b>1mM</b>                      | 21278 ± 1013 cells          | 7944 ± 441 cells            | 3778 ± 900 cells            |
|              | <b>8mM</b>                      | 21833 ± 1269 cells          | 13222 ± 1202 cells          | 12667 ± 717 cells           |
|              | <b>15mM</b>                     | 26277 ± 773 cells           | 26833 ± 774 cells           | 26833 ± 774 cells           |
|              | <b>Control (NO DOX)</b>         | 27944 ± 1294 cells          | 27944 ± 776 cells           | 27944 ± 1294 cells          |
|              | <b>Control + Tiron (NO DOX)</b> | 27944 ± 1035 cells          | 28222 ± 518 cells           | 28500 ± 78 cells            |

  

| <b>(B)</b> |                                 | <b>Day 1</b>                | <b>Day 3</b>                | <b>Day 5</b>                |
|------------|---------------------------------|-----------------------------|-----------------------------|-----------------------------|
|            |                                 | <b>Number of LIVE cells</b> | <b>Number of LIVE cells</b> | <b>Number of LIVE cells</b> |
| <b>NAC</b> | <b>1mM</b>                      | 21556 ± 761 cells           | 9333 ± 911 cells            | 4611 ± 769 cells            |
|            | <b>8mM</b>                      | 22388 ± 2035 cells          | 13222 ± 1202 cells          | 12667 ± 956 cells           |
|            | <b>15mM</b>                     | 26833 ± 774 cells           | 26278 ± 1030 cells          | 26833 ± 774 cells           |
|            | <b>Control (NO DOX)</b>         | 27944 ± 1294 cells          | 27944 ± 776 cells           | 27944 ± 1294 cells          |
|            | <b>Control + Tiron (NO DOX)</b> | 27944 ± 776 cells           | 27944 ± 1035 cells          | 28222 ± 1295 cells          |

**Figure S9.** Tables showing the amount of live CMs in 2D samples post-treatment with increasing concentrations of (A) Tiron and (B) NAC extrapolated from the linear best fit curve of MTS data during 5 days of culture.

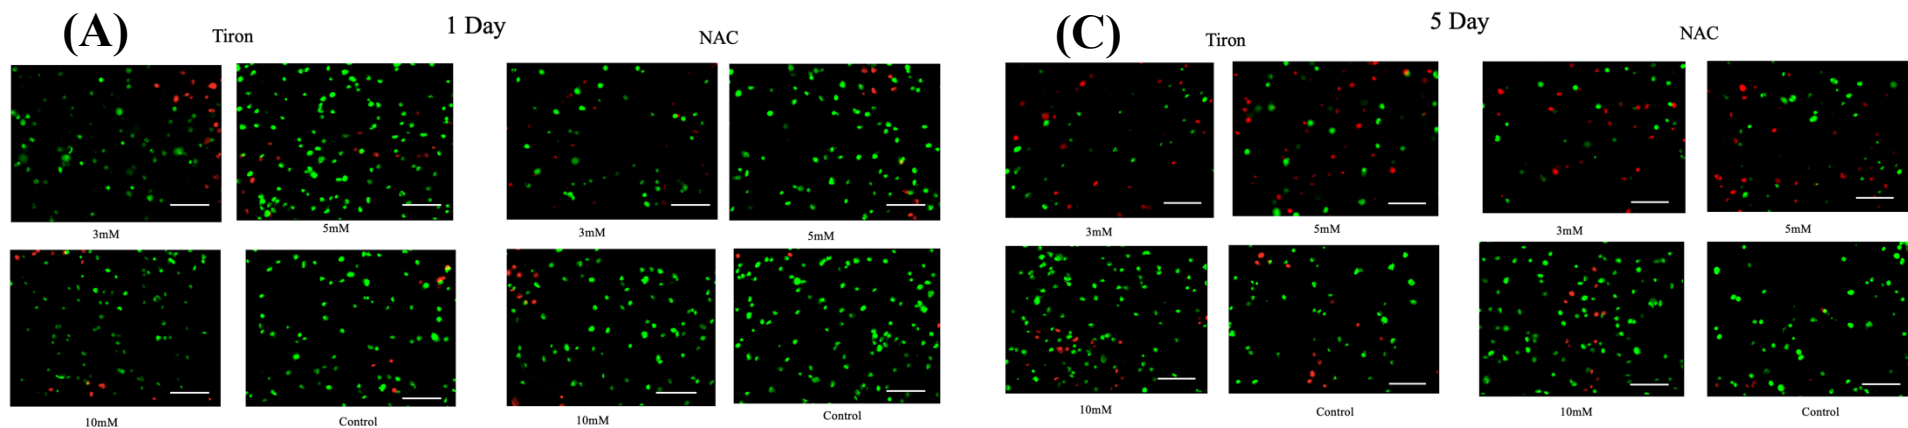

**(B)**

|       |                     | Day 1<br>% Cell Viability<br>(% CV) | Day 5<br>% Cell Viability<br>(% CV) |
|-------|---------------------|-------------------------------------|-------------------------------------|
| Tiron | 3mM                 | 84 ± 21%                            | 51 ± 24%                            |
|       | 5mM                 | 87 ± 10%                            | 50 ± 8%                             |
|       | 10mM                | 88 ± 8%                             | 85 ± 12%                            |
|       | Control<br>(NO DOX) | 94 ± 7%                             | 80 ± 10%                            |

**(D)**

|     |                     | Day 1<br>% Cell Viability<br>(% CV) | Day 5<br>% Cell Viability<br>(% CV) |
|-----|---------------------|-------------------------------------|-------------------------------------|
| NAC | 3mM                 | 71 ± 6%                             | 55 ± 3%                             |
|     | 5mM                 | 90 ± 12%                            | 54 ± 12%                            |
|     | 10mM                | 90 ± 13%                            | 88 ± 5%                             |
|     | Control<br>(NO DOX) | 98 ± 3%                             | 95 ± 8%                             |

**Figure S10.** Representative fluorescence images of live/dead staining of 3D bioprinted spheroidal scaffolds treated with increasing concentrations (3mM, 5mM, and 10mM) of Tiron and NAC and 1 $\mu$ M DOX. Live cells are stained in green by calcein AM and dead cells stained in red by ethidium homodimer after (A) 1 day and (C) 5 days of culture. (B, D) Tables representing the percent live/dead cells of CMs. The scale bar corresponds to 100 $\mu$ m.

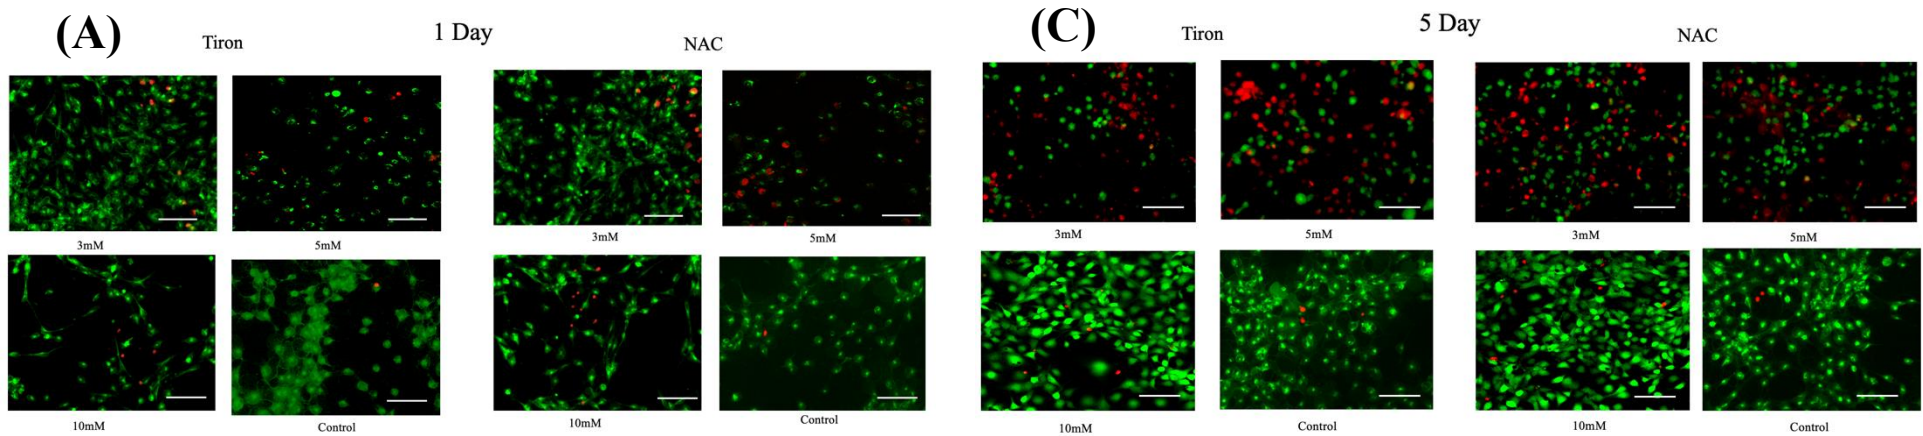

| (B)   |                  | Day 1                   | Day 5                   |
|-------|------------------|-------------------------|-------------------------|
|       |                  | % Cell Viability (% CV) | % Cell Viability (% CV) |
| Tiron | 3mM              | 94 ± 7%                 | 45 ± 11%                |
|       | 5mM              | 93 ± 6%                 | 49 ± 9%                 |
|       | 10mM             | 92 ± 10%                | 93 ± 8%                 |
|       | Control (NO DOX) | 99 ± 3%                 | 97 ± 3%                 |

| (D) |                  | Day 1                   | Day 5                   |
|-----|------------------|-------------------------|-------------------------|
|     |                  | % Cell Viability (% CV) | % Cell Viability (% CV) |
| NAC | 3mM              | 94 ± 10%                | 57 ± 7%                 |
|     | 5mM              | 90 ± 8%                 | 70 ± 14%                |
|     | 10mM             | 92 ± 13%                | 90 ± 10%                |
|     | Control (NO DOX) | 99 ± 2%                 | 99 ± 2%                 |

**Figure S11.** Representative fluorescence images of live/dead staining of cardiomyocytes grown in 2D samples treated with increasing concentrations (3mM, 5mM, and 10mM) of Tiron and NAC and 1µM DOX. Live cells are stained in green by calcein AM and dead cells stained in red by ethidium homodimer treated with Tiron and NAC after (A) 1 day and (C) 5 days of culture. (B, D) Tables representing the percent live/dead cells of CMs. The scale bar corresponds to 100µm.

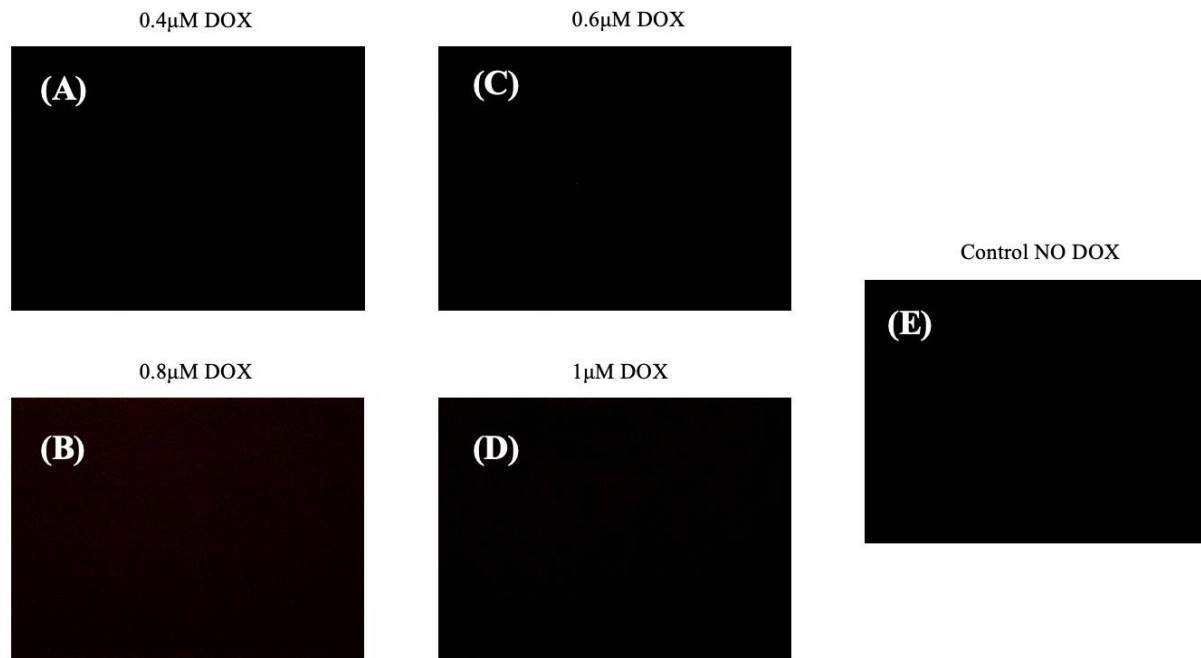

**Figure S12:** (A-D) Representative figures acquired using the 43 DsRed filter showing no fluorescence with different concentrations of DOX (0.4 $\mu$ M, 0.6 $\mu$ M, 0.8 $\mu$ M and 1 $\mu$ M) in comparison to the control sample scaffold (E) where DOX was not administered.

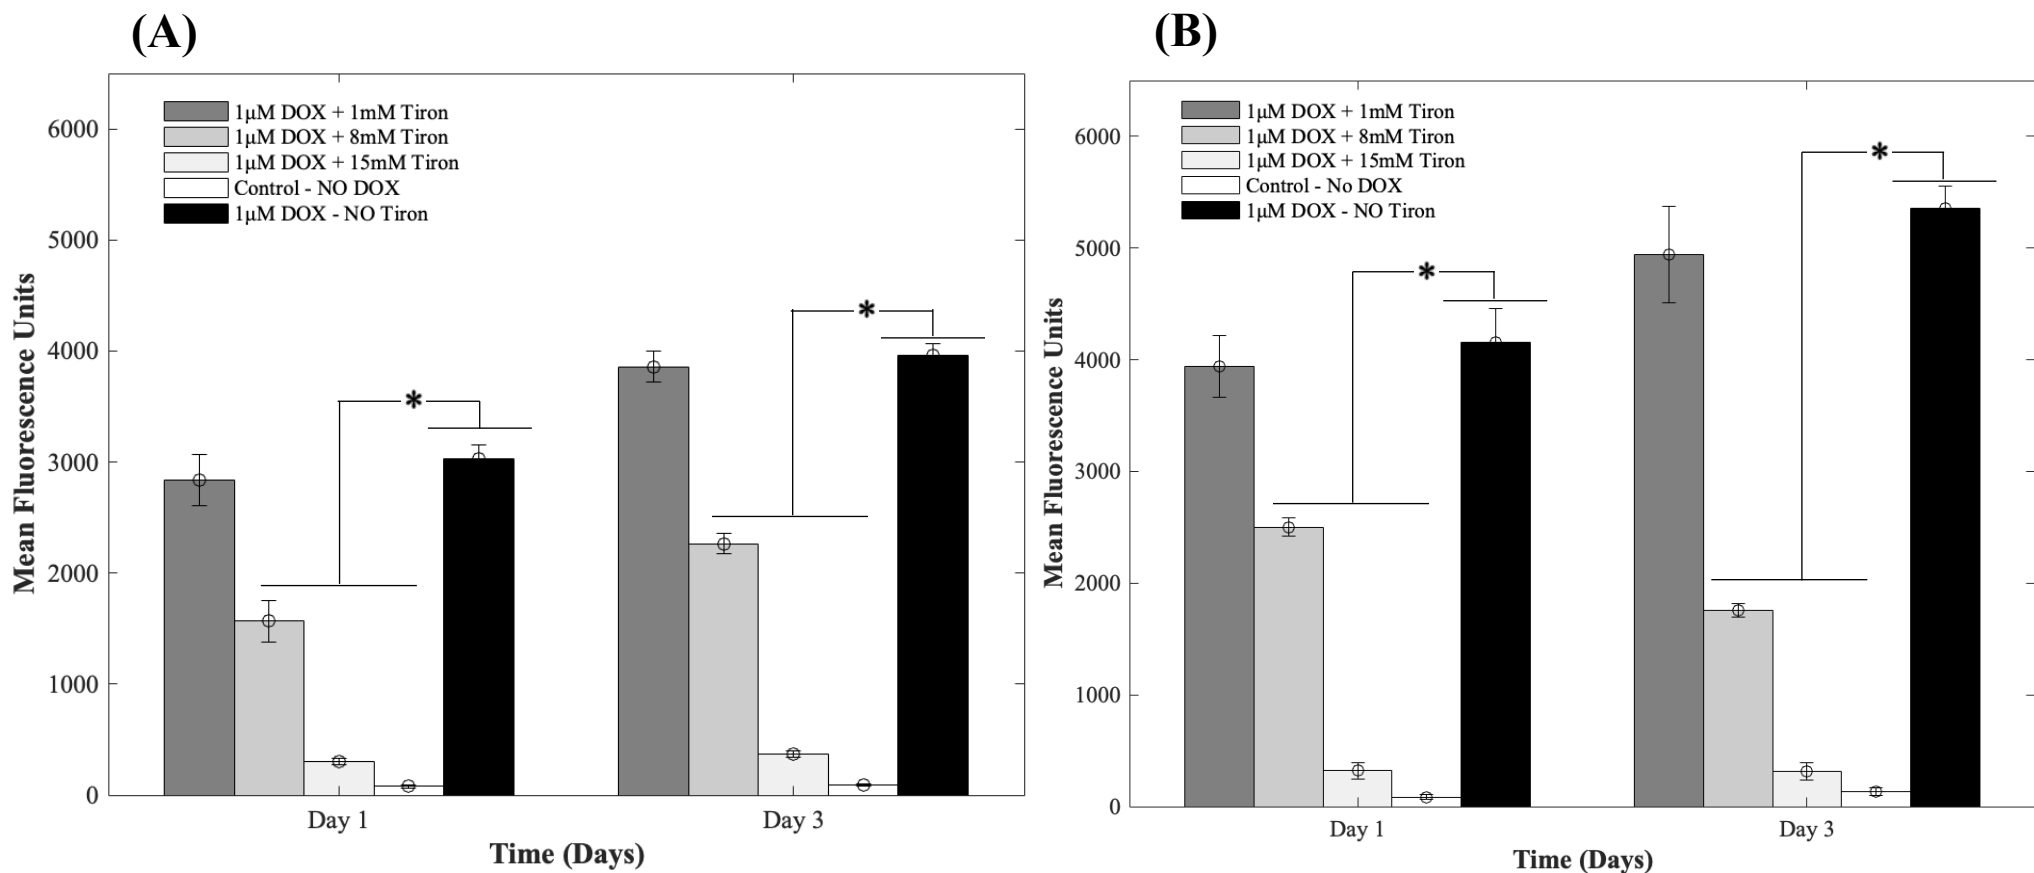

**Figure S13.** Bar charts illustrating intracellular ROS production using DHE staining of CMs treated with 1,8, and 15 mM of Tiron and 1µM DOX in (A) 3D spheroidal droplets and (B) 2D samples. \**p* values were found to be all statistically different (*p*<0.05).

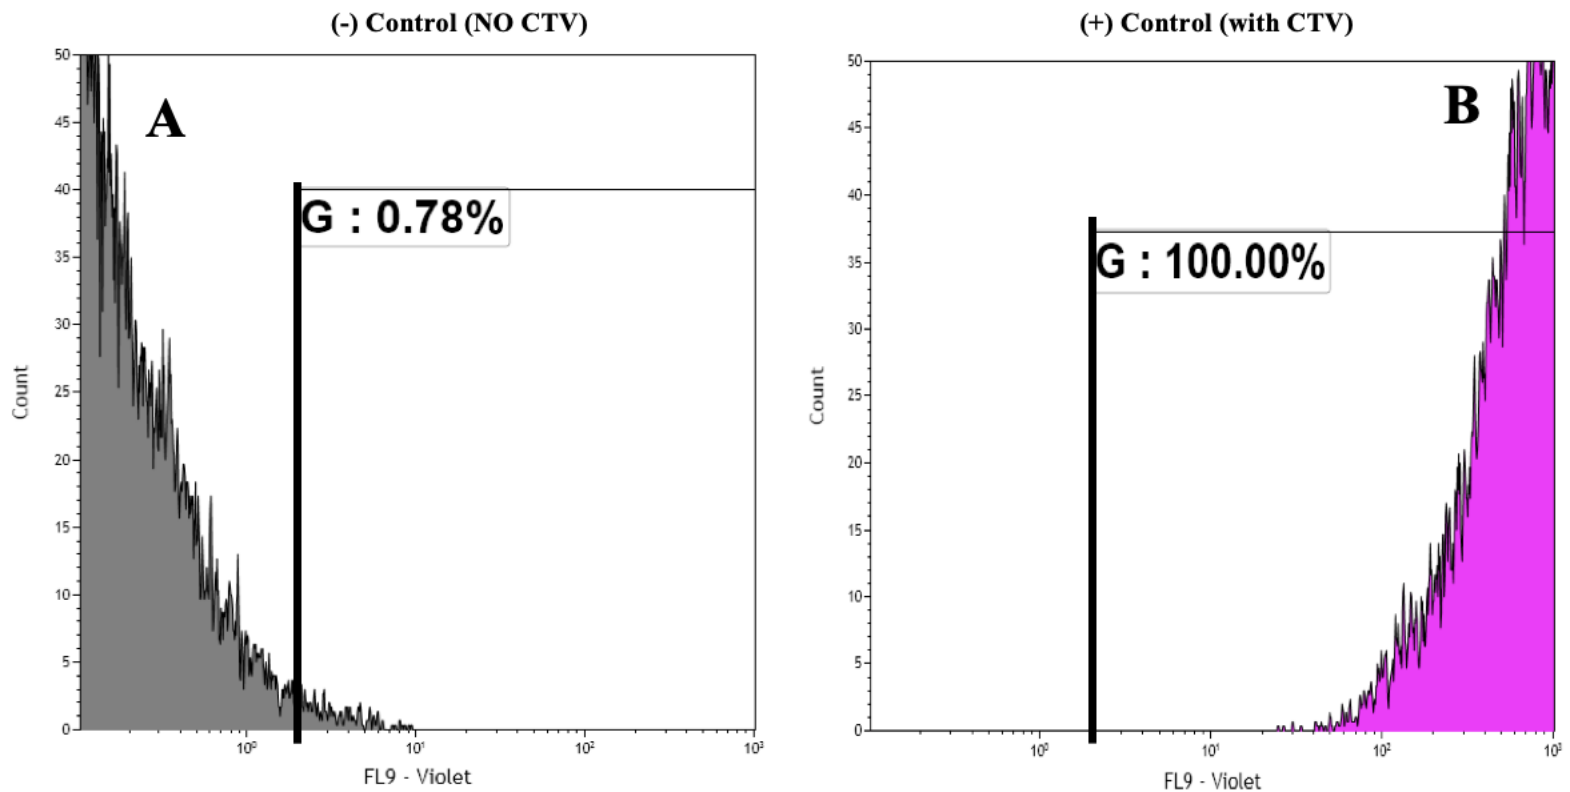

**Figure S14.** (A) Representative figure demonstrating a characteristic peak of a negative control samples (to the left). On the other hand, shown to the right is a characteristic peak of a positive control sample (B) whereby cells were prestained with CTV dye.

**Supplementary Table 1. Dose responsive effects of DOX on CMs using 3D bioprinted spheroidal droplets (A) and 2D samples (B).** Optical density measurements for MTS assay of CMs treated with increasing concentrations of DOX during 5 days of culture. Table showing the percent cell viability of CMs in 3D bioprinted spheroidal droplets (A) and 2D samples (B) treated with increasing concentrations of doxorubicin extrapolated from the linear best fit curve of MTS data (Figure S1-A and S8-A) over 5 days. The actual cell numbers used to generate % CV are shown in Figure S1-B and S8-B.

| <b>(A)</b>                      | <b>Day 1</b>    |                                | <b>Day 3</b>    |                                | <b>Day 5</b>      |                                |
|---------------------------------|-----------------|--------------------------------|-----------------|--------------------------------|-------------------|--------------------------------|
|                                 | <b>OD Value</b> | <b>% Cell Viability (% CV)</b> | <b>OD Value</b> | <b>% Cell Viability (% CV)</b> | <b>OD Value</b>   | <b>% Cell Viability (% CV)</b> |
| <b>0.4<math>\mu</math>M DOX</b> | 0.90 $\pm$ 0.02 | 97 $\pm$ 2%                    | 0.80 $\pm$ 0.04 | 86 $\pm$ 4%                    | 0.52 $\pm$ 0.04   | 56 $\pm$ 4%                    |
| <b>0.6<math>\mu</math>M DOX</b> | 0.85 $\pm$ 0.05 | 91 $\pm$ 5%                    | 0.67 $\pm$ 0.04 | 72 $\pm$ 4%                    | 0.43 $\pm$ 0.03   | 46 $\pm$ 3%                    |
| <b>0.8<math>\mu</math>M DOX</b> | 0.77 $\pm$ 0.06 | 82 $\pm$ 6%                    | 0.33 $\pm$ 0.06 | 33 $\pm$ 6%                    | 0.12 $\pm$ 0.02   | 10 $\pm$ 2%                    |
| <b>1<math>\mu</math>M DOX</b>   | 0.71 $\pm$ 0.03 | 75 $\pm$ 3%                    | 0.20 $\pm$ 0.03 | 19 $\pm$ 3%                    | 0.002 $\pm$ 0.001 | 0.22 $\pm$ 0.11%               |
| <b>Control (NO DOX)</b>         | 0.93 $\pm$ 0.03 | 100%                           | 0.92 $\pm$ 0.04 | 100%                           | 0.90 $\pm$ 0.04   | 100%                           |

| <b>(B)</b>                      | <b>Day 1</b>    |                                | <b>Day 3</b>    |                                | <b>Day 5</b>      |                                |
|---------------------------------|-----------------|--------------------------------|-----------------|--------------------------------|-------------------|--------------------------------|
|                                 | <b>OD Value</b> | <b>% Cell Viability (% CV)</b> | <b>OD Value</b> | <b>% Cell Viability (% CV)</b> | <b>OD Value</b>   | <b>% Cell Viability (% CV)</b> |
| <b>0.4<math>\mu</math>M DOX</b> | 1.02 $\pm$ 0.04 | 94 $\pm$ 4%                    | 0.83 $\pm$ 0.04 | 75 $\pm$ 4%                    | 0.72 $\pm$ 0.04   | 64 $\pm$ 4%                    |
| <b>0.6<math>\mu</math>M DOX</b> | 1.00 $\pm$ 0.05 | 92 $\pm$ 5%                    | 0.67 $\pm$ 0.04 | 59 $\pm$ 4%                    | 0.56 $\pm$ 0.04   | 48 $\pm$ 3%                    |
| <b>0.8<math>\mu</math>M DOX</b> | 0.90 $\pm$ 0.06 | 82 $\pm$ 6%                    | 0.30 $\pm$ 0.06 | 22 $\pm$ 4%                    | 0.22 $\pm$ 0.02   | 15 $\pm$ 1%                    |
| <b>1<math>\mu</math>M DOX</b>   | 0.81 $\pm$ 0.05 | 73 $\pm$ 5%                    | 0.14 $\pm$ 0.04 | 7 $\pm$ 2%                     | 0.011 $\pm$ 0.003 | 1.02 $\pm$ 0.28%               |
| <b>Control (NO DOX)</b>         | 1.08 $\pm$ 0.05 | 100%                           | 1.08 $\pm$ 0.03 | 100%                           | 1.08 $\pm$ 0.05   | 100%                           |

**Supplementary Table 2. Quantitative analysis depicting the effects of supplementing Tiron/NAC on CMs using 3D spheroidal droplets (A, B) and 2D samples (C, D).** Optical density measurements for MTS assay of CMs treated with increasing concentrations (1mM, 8mM, and 15mM) of Tiron and NAC with 1 $\mu$ M DOX. Tables representing the percent cell viability of CMs in 3D spheroidal droplets (A and B) and 2D samples (C and D) extrapolated from the linear best fit curve of MTS data during 5 days of culture. \*p values were found to be all statistically different. The actual cell numbers used to generate % CV are shown in Figure S8.

## Tiron

**(A)**

|       |                          | Day 1           |                         | Day 3           |                         | Day 5           |                         |
|-------|--------------------------|-----------------|-------------------------|-----------------|-------------------------|-----------------|-------------------------|
|       |                          | OD Value        | % Cell Viability (% CV) | OD Value        | % Cell Viability (% CV) | OD Value        | % Cell Viability (% CV) |
| Tiron | 1mM                      | 0.77 $\pm$ 0.06 | 82 $\pm$ 6%             | 0.39 $\pm$ 0.03 | 40 $\pm$ 3%             | 0.24 $\pm$ 0.03 | 24 $\pm$ 3%             |
|       | 8mM                      | 0.78 $\pm$ 0.06 | 83 $\pm$ 6%             | 0.50 $\pm$ 0.04 | 53 $\pm$ 4%             | 0.47 $\pm$ 0.02 | 50 $\pm$ 2%             |
|       | 15mM                     | 0.91 $\pm$ 0.05 | 98 $\pm$ 5%             | 0.91 $\pm$ 0.04 | 99 $\pm$ 4%             | 0.83 $\pm$ 0.05 | 92 $\pm$ 6%             |
|       | Control (NO DOX)         | 0.93 $\pm$ 0.04 | 100%                    | 0.92 $\pm$ 0.04 | 100%                    | 0.90 $\pm$ 0.04 | 100%                    |
|       | Control + Tiron (NO DOX) | 0.92 $\pm$ 0.05 | 100%                    | 0.91 $\pm$ 0.03 | 100%                    | 0.91 $\pm$ 0.04 | 100%                    |

## NAC

**(B)**

|     |                        | Day 1           |                         | Day 3           |                         | Day 5           |                         |
|-----|------------------------|-----------------|-------------------------|-----------------|-------------------------|-----------------|-------------------------|
|     |                        | OD Value        | % Cell Viability (% CV) | OD Value        | % Cell Viability (% CV) | OD Value        | % Cell Viability (% CV) |
| NAC | 1mM                    | 0.74 $\pm$ 0.03 | 78 $\pm$ 3%             | 0.42 $\pm$ 0.04 | 44 $\pm$ 4%             | 0.25 $\pm$ 0.04 | 25 $\pm$ 4%             |
|     | 8mM                    | 0.77 $\pm$ 0.04 | 82 $\pm$ 4%             | 0.52 $\pm$ 0.04 | 55 $\pm$ 4%             | 0.50 $\pm$ 0.03 | 54 $\pm$ 3%             |
|     | 15mM                   | 0.90 $\pm$ 0.02 | 97 $\pm$ 2%             | 0.86 $\pm$ 0.05 | 93 $\pm$ 5%             | 0.86 $\pm$ 0.02 | 95 $\pm$ 2%             |
|     | Control (NO DOX)       | 0.93 $\pm$ 0.04 | 100%                    | 0.92 $\pm$ 0.04 | 100%                    | 0.90 $\pm$ 0.04 | 100%                    |
|     | Control + NAC (NO DOX) | 0.92 $\pm$ 0.03 | 100%                    | 0.92 $\pm$ 0.05 | 100%                    | 0.90 $\pm$ 0.04 | 100%                    |

**(C)**

|       |                          | Day 1           |                         | Day 3           |                         | Day 5            |                         |
|-------|--------------------------|-----------------|-------------------------|-----------------|-------------------------|------------------|-------------------------|
|       |                          | OD Value        | % Cell Viability (% CV) | OD Value        | % Cell Viability (% CV) | OD Value         | % Cell Viability (% CV) |
| Tiron | 1mM                      | 0.84 $\pm$ 0.04 | 76 $\pm$ 4%             | 0.36 $\pm$ 0.02 | 28 $\pm$ 2%             | 0.21 $\pm$ 0.05  | 14 $\pm$ 3%             |
|       | 8mM                      | 0.86 $\pm$ 0.05 | 78 $\pm$ 5%             | 0.55 $\pm$ 0.05 | 47 $\pm$ 4%             | 0.53 $\pm$ 0.03  | 45 $\pm$ 3%             |
|       | 15mM                     | 1.02 $\pm$ 0.03 | 94 $\pm$ 3%             | 1.04 $\pm$ 0.03 | 96 $\pm$ 3%             | 1.04 $\pm$ 0.03  | 96 $\pm$ 3%             |
|       | Control (NO DOX)         | 1.08 $\pm$ 0.05 | 100%                    | 1.08 $\pm$ 0.03 | 100%                    | 1.08 $\pm$ 0.05  | 100%                    |
|       | Control + Tiron (NO DOX) | 1.08 $\pm$ 0.04 | 100%                    | 1.09 $\pm$ 0.02 | 100%                    | 1.10 $\pm$ 0.003 | 100%                    |

**(D)**

|     |                        | Day 1           |                         | Day 3           |                         | Day 5           |                         |
|-----|------------------------|-----------------|-------------------------|-----------------|-------------------------|-----------------|-------------------------|
|     |                        | OD Value        | % Cell Viability (% CV) | OD Value        | % Cell Viability (% CV) | OD Value        | % Cell Viability (% CV) |
| NAC | 1mM                    | 0.85 $\pm$ 0.03 | 77 $\pm$ 3%             | 0.41 $\pm$ 0.04 | 33 $\pm$ 3%             | 0.24 $\pm$ 0.04 | 17 $\pm$ 3%             |
|     | 8mM                    | 0.88 $\pm$ 0.08 | 80 $\pm$ 7%             | 0.55 $\pm$ 0.05 | 47 $\pm$ 4%             | 0.53 $\pm$ 0.04 | 45 $\pm$ 3%             |
|     | 15mM                   | 1.04 $\pm$ 0.03 | 96 $\pm$ 3%             | 1.02 $\pm$ 0.04 | 94 $\pm$ 4%             | 1.04 $\pm$ 0.03 | 96 $\pm$ 3%             |
|     | Control (NO DOX)       | 1.08 $\pm$ 0.05 | 100%                    | 1.08 $\pm$ 0.03 | 100%                    | 1.08 $\pm$ 0.05 | 100%                    |
|     | Control + NAC (NO DOX) | 1.08 $\pm$ 0.03 | 100%                    | 1.08 $\pm$ 0.04 | 100%                    | 1.09 $\pm$ 0.05 | 100%                    |



**Supplementary Table 3. Live/Dead assay analysis representing the effects of supplementing Tiron/NAC on 3D spheroids droplets (A, C) and 2D samples (B, D) with CM.** Tables representing the percent live/dead cells fluorescence staining of CMs grown on 3D spheroids droplet and 2D models treated with increasing concentrations of AO (1mM, 8mM, and 15mM) and 1 $\mu$ M DOX..

**(A)**

|              |                         | Day 1                   | Day 5                   |
|--------------|-------------------------|-------------------------|-------------------------|
|              |                         | % Cell Viability (% CV) | % Cell Viability (% CV) |
| <b>Tiron</b> | <b>1mM</b>              | 85 $\pm$ 13%            | 42 $\pm$ 13%            |
|              | <b>8mM</b>              | 89 $\pm$ 13%            | 52 $\pm$ 6%             |
|              | <b>15mM</b>             | 95 $\pm$ 11%            | 93 $\pm$ 9%             |
|              | <b>Control (NO DOX)</b> | 94 $\pm$ 9%             | 94 $\pm$ 6%             |

**(C)**

|            |                         | Day 1                   | Day 5                   |
|------------|-------------------------|-------------------------|-------------------------|
|            |                         | % Cell Viability (% CV) | % Cell Viability (% CV) |
| <b>NAC</b> | <b>1mM</b>              | 84 $\pm$ 12%            | 52 $\pm$ 4%             |
|            | <b>8mM</b>              | 94 $\pm$ 11%            | 54 $\pm$ 3%             |
|            | <b>15mM</b>             | 93 $\pm$ 14%            | 96 $\pm$ 4%             |
|            | <b>Control (NO DOX)</b> | 95 $\pm$ 3%             | 94 $\pm$ 12%            |

**(B)**

|              |                         | Day 1                   | Day 5                   |
|--------------|-------------------------|-------------------------|-------------------------|
|              |                         | % Cell Viability (% CV) | % Cell Viability (% CV) |
| <b>Tiron</b> | <b>1mM</b>              | 94 $\pm$ 7%             | 57 $\pm$ 9%             |
|              | <b>8mM</b>              | 89 $\pm$ 13%            | 43 $\pm$ 9%             |
|              | <b>15mM</b>             | 89 $\pm$ 22%            | 95 $\pm$ 6%             |
|              | <b>Control (NO DOX)</b> | 95 $\pm$ 4%             | 94 $\pm$ 6%             |

**(D)**

|            |                         | Day 1                   | Day 5                   |
|------------|-------------------------|-------------------------|-------------------------|
|            |                         | % Cell Viability (% CV) | % Cell Viability (% CV) |
| <b>NAC</b> | <b>1mM</b>              | 90 $\pm$ 7%             | 56 $\pm$ 8%             |
|            | <b>8mM</b>              | 90 $\pm$ 12%            | 49 $\pm$ 12%            |
|            | <b>15mM</b>             | 96 $\pm$ 5%             | 95 $\pm$ 6%             |
|            | <b>Control (NO DOX)</b> | 93 $\pm$ 8%             | 94 $\pm$ 7%             |

**Supplementary Table 4:** Analysis of the effect of DOX and NAC using FACS analysis within the 3D bioprinted spheroidal droplets (A) and 2D (B). Cardiomyocytes were prestained with CellTrace Violet (CTV) and mixed with the bioink prior to the 3D bioprinting and 2D. Cells were extracted from the scaffolds and culture plates from the experimental and control groups and analyzed using a flow cytometer. Shown in A and B is the average of %CTV+ of prestained CMs on days 1 and 3.

**(A)**

|                          |                  | 1 $\mu$ M DOX<br>+ 1mM NAC | 1 $\mu$ M DOX<br>+ 8mM NAC | 1 $\mu$ M DOX<br>+ 15mM NAC | (+) Control<br>1 $\mu$ M DOX | (-) Control<br>NO DOX |
|--------------------------|------------------|----------------------------|----------------------------|-----------------------------|------------------------------|-----------------------|
| <b>Day 1</b>             | Average<br>%CTV+ | 91.87 $\pm$ 5.3%           | 88.07 $\pm$ 7.63%          | 87.75 $\pm$ 8.56%           | 88.27 $\pm$ 9.79%            | 87.02 $\pm$ 4.82%     |
| <b>Day 3</b>             | Average<br>%CTV+ | 88.84 $\pm$ 3.83%          | 93.11 $\pm$ 1.37%          | 88.16 $\pm$ 7.81%           | 87.29 $\pm$ 2.99%            | 78.77 $\pm$ 0.40      |
| % Change (DAY 1 – DAY 3) |                  | -3.29 $\pm$ 0.02%          | 5.72 $\pm$ 0.07%           | 0.47 $\pm$ 0.008%           | -1.12 $\pm$ 0.01%            | -9.48 $\pm$ 0.05%     |

**(B)**

|                          |                  | 1 $\mu$ M DOX<br>+ 1mM NAC | 1 $\mu$ M DOX<br>+ 8mM NAC | 1 $\mu$ M DOX<br>+ 15mM NAC | (+) Control<br>1 $\mu$ M DOX | (-) Control<br>NO DOX |
|--------------------------|------------------|----------------------------|----------------------------|-----------------------------|------------------------------|-----------------------|
| <b>Day 1</b>             | Average<br>%CTV+ | 93.83 $\pm$ 1.97%          | 93.66 $\pm$ 0.98%          | 89.35 $\pm$ 5.14%           | 92.64 $\pm$ 0.32%            | 89.22 $\pm$ 4.71%     |
| <b>Day 3</b>             | Average<br>%CTV+ | 94.19 $\pm$ 0.17%          | 94.04 $\pm$ 1.64%          | 93.72 $\pm$ 1.96%           | 94.21 $\pm$ 2.12%            | 74.67 $\pm$ 1.03%     |
| % Change (DAY 1 – DAY 3) |                  | 0.38 $\pm$ 0.02%           | 0.41 $\pm$ 0.007%          | 4.89 $\pm$ 0.03%            | 1.69 $\pm$ 0.02%             | -16.17 $\pm$ 0.04%    |
